# Supplementary material
Source: PubMed Central journal article supplement (PMC7769145)
Supplement: NIHMS1646088-supplement-1.pdf [file NIHMS1646088-supplement-1.pdf]

## SUPPLEMENTAL INFORMATION

### Gene- and species-specific Hox mRNA translation by ribosome expansion segments

Kathrin Leppek<sup>1,2</sup>, Kotaro Fujii<sup>1,2</sup>, Nick Quade<sup>3</sup>, Teodorus Theo Susanto<sup>1,2</sup>, Daniel Boehringer<sup>3</sup>,  
Tea Lenarčič<sup>3</sup>, Shifeng Xue<sup>1,2,†</sup>, Naomi R. Genuth<sup>1,2</sup>, Nenad Ban<sup>3\*</sup>, and Maria Barna<sup>1,2,4,\*</sup>

<sup>1</sup> Department of Developmental Biology, Stanford University, Stanford, California 94305, USA

<sup>2</sup> Department of Genetics, Stanford University, Stanford, California 94305, USA

<sup>3</sup> Department of Biology, Institute of Molecular Biology and Biophysics, Otto-Stern-Weg 5, ETH Zürich, Zürich 8093, Switzerland

<sup>†</sup> present address: Department of Biological Sciences, National University of Singapore, 14 Science Drive 4, Singapore 117543

<sup>4</sup> Lead Contact: Maria Barna, [mbarna@stanford.edu](mailto:mbarna@stanford.edu)

\* co-corresponding authors, contact: [ban@mol.biol.ethz.ch](mailto:ban@mol.biol.ethz.ch); [mbarna@stanford.edu](mailto:mbarna@stanford.edu)

#### **This document includes:**

Figures S1 to S7

Tables S1 to S3

#### **Other supplementary material for this manuscript includes the following:**

Table S4: Relative protein quantification with TMT labelling for 4xS1m pulldown from C3H/10T1/2 cells

Table S5: Relative protein quantification with TMT labelling for 4xS1m pulldown from mouse embryos

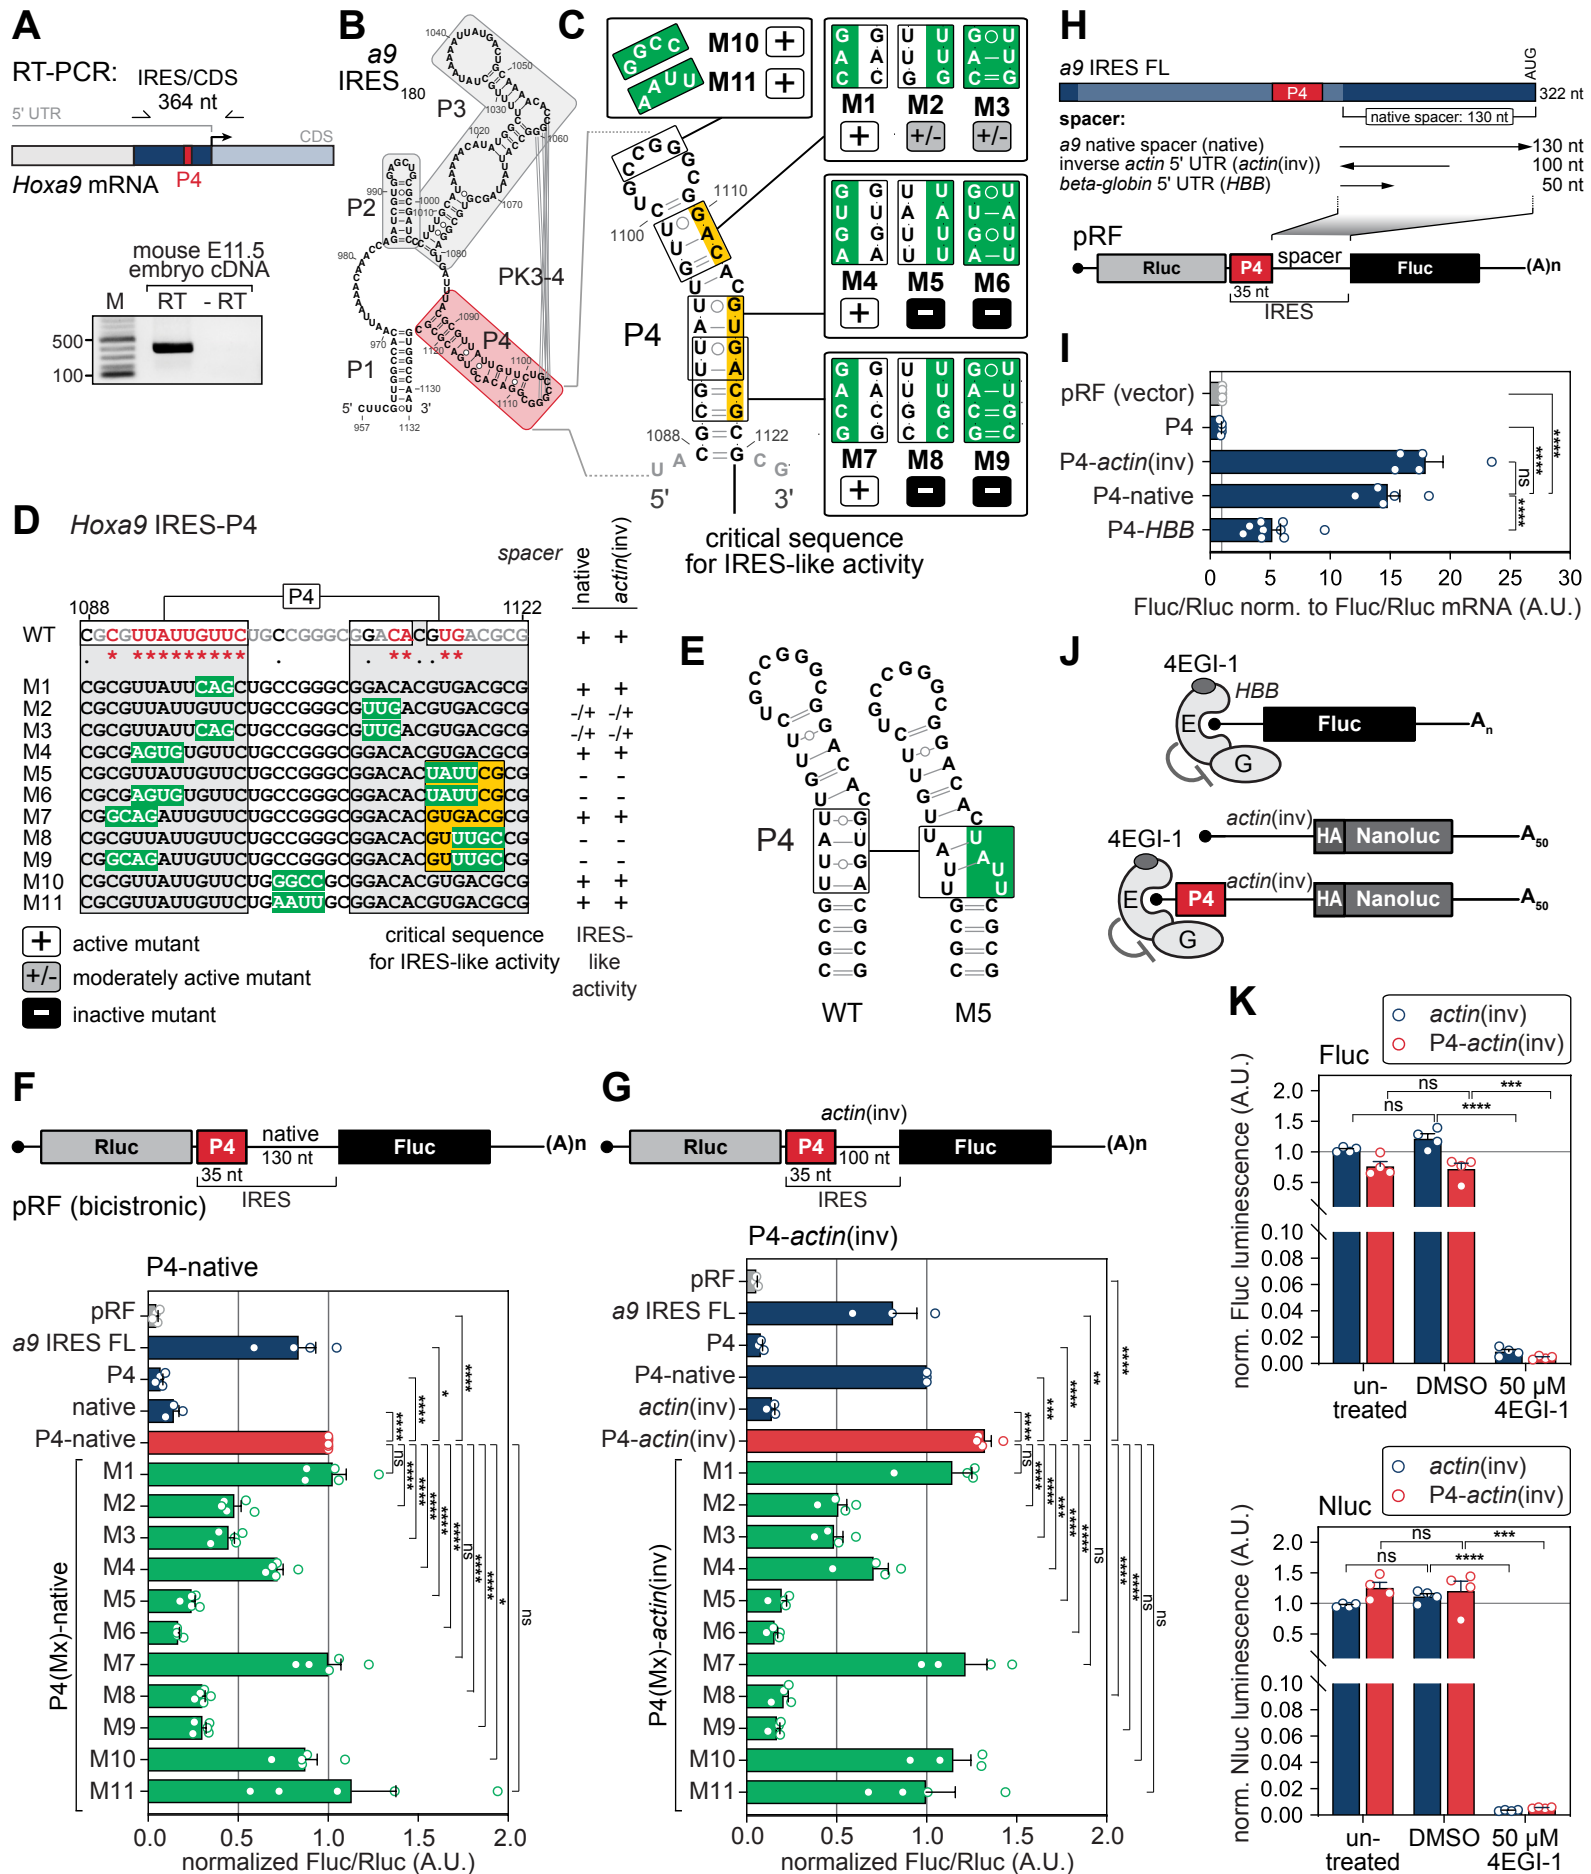

**Figure S1. The short stem-loop P4 in the *Hoxa9* 5' UTR is sufficient for recruitment of the ribosome and acts as a translational enhancer. Related to Figure 1, 2.**

(A) RT-PCR analysis of the *Hoxa9* IRES-like element using cDNA from stage E11.5 FVB embryo mRNA and primers specific for the most 5' region of the IRES in the 5' UTR and for the CDS region (see **Table S3**). Sequencing of the single PCR product confirms the *a9* IRES sequence as annotated.

(B) Schematic representation of the mouse *Hoxa9* secondary structure model of the 180 nucleotides (nt) long *Hoxa9* IRES-like element RNA (termed *a9* IRES<sub>180</sub>) (Xue et al., 2015) containing four pairing elements P1-P4 and a putative pseudoknot (PK), and P4 (red) highlighted. Numbers refer to nucleotide positions within the *Hoxa9* 5' UTR.

(C) Secondary structure model of the P4 stem-loop and substitution mutations mapped onto the P4 structure. Numbers refer to nucleotide positions within the *Hoxa9* 5' UTR. P4 stem mutations were introduced either in one strand to disrupt P4, or as compensatory mutations in both strands to restore P4. P4 mutants active in mediating IRES-like activity in the context of the fusion to the native spacer (P4-native) or the *actin(inv)* 5' UTR sequence (P4-*actin(inv)*) (normalized Fluc/Rluc < 0.5 A.U.) are labeled "+", moderately active mutants (Fluc/Rluc < 0.5, > 1.0 A.U.) are labeled "+/-", and inactive mutants (Fluc/Rluc > 0.5 A.U.) are labeled "-". Sequence critical for IRES activity is highlighted in yellow. Adapted from **Figure 1C**.

(D) The same substitution mutations as in (C) were mapped onto the linear P4 sequence, together with the IRES-like activity (+, +/-, -) of the corresponding reporter mRNAs in context of the native spacer or the *actin(inv)* sequence.

(E) Secondary structure models of WT P4 and P4(M5) were based on SHAPE structure probing (Xue et al., 2015) and prediction of structural changes induced by the 4 nt M5 mutation (green) using Vienna RNAfold (<http://rna.tbi.univie.ac.at>) and visualized using VARNA (<http://varna.lri.fr>) with default settings.

(F) The effect of the P4 substitution mutations in the P4-native context, as displayed in the reporter schematic, on IRES-like activity was measured by transiently transfecting mouse C3H/10T1/2 cells with the corresponding bicistronic reporter genes containing no insert in the intergenic region (pRF, empty vector), *a9* IRES FL, P4, native or a fusion of P4 mutants M1-M11 with the native spacer downstream of P4 (labelled M1-M11). Cells were harvested after 24 hours for protein lysates and subjected to the luciferase activity assay. Luciferase activity analysis was carried out as in **Figure 1E**. Relative luciferase activity was expressed as a Fluc(IRES)/Rluc(cap-initiation) ratio and expressed as average IRES activity  $\pm$  SEM, n = 3-8; ns, not significant. FL, full-length.

(G) Bicistronic reporter assay as described in (E), and as displayed in the reporter schematic, using P4-*actin(inv)* fusion constructs testing P4 mutants M1-M11. Relative luciferase activity was expressed as average IRES activity  $\pm$  SEM, n = 3-5.

(H) Schematic representation of the mouse *Hoxa9* IRES-like element, including P4 and the "native" spacer of 130 nt between P4 and the AUG. Spacer length requirements for P4 IRES-like activity were tested by insertion of spacers of different lengths, the native spacer, the inverse *actin* 5' UTR sequence (*actin(inv)*), or the HBB 5' UTR (*HBB*), downstream of P4 in a bicistronic reporter mRNA. Rluc, renilla luciferase; Fluc, firefly luciferase. FL, full-length. Partially reproduced from **Figure 1B, D**.

(I) Luciferase activity analysis in C3H/10T1/2 cells was carried out as in **Figure 1E**. Relative luciferase activity is expressed as a Fluc(IRES)/Rluc(cap-initiation) ratio normalized to respective Fluc/Rluc mRNA levels and given as average IRES activity  $\pm$  SEM, n = 5-9; ns, not significant.

(J) Cap inhibition by eIF4E-binding drug 4EGI-1 uncouples cap-dependent translation from P4-mediated translation enhancer function. Schematic of m<sup>7</sup>G-capped Fluc and Nluc reporter mRNAs and inhibitor function. See also **Figure 2E**.

(K) Luciferase activity analysis in C3H/10T1/2 cells was carried out as in **Figure 2F**. Luciferase activity values that correspond to the data in **Figure 2F** are expressed as normalized Fluc or Nluc luminescence given as average luminescence  $\pm$  SEM, n = 4; ns, not significant; *actin(inv)*, untreated was set to 1.

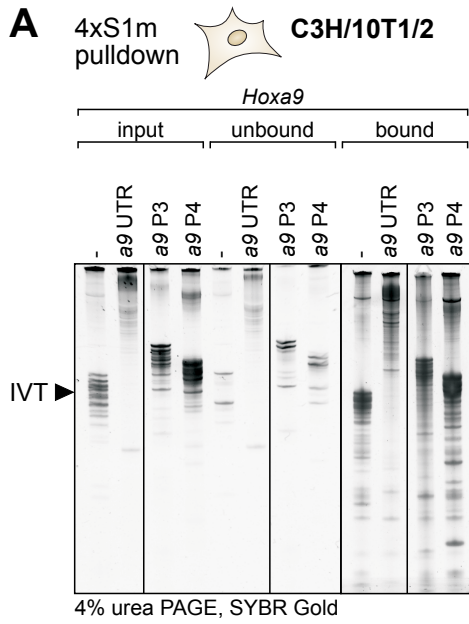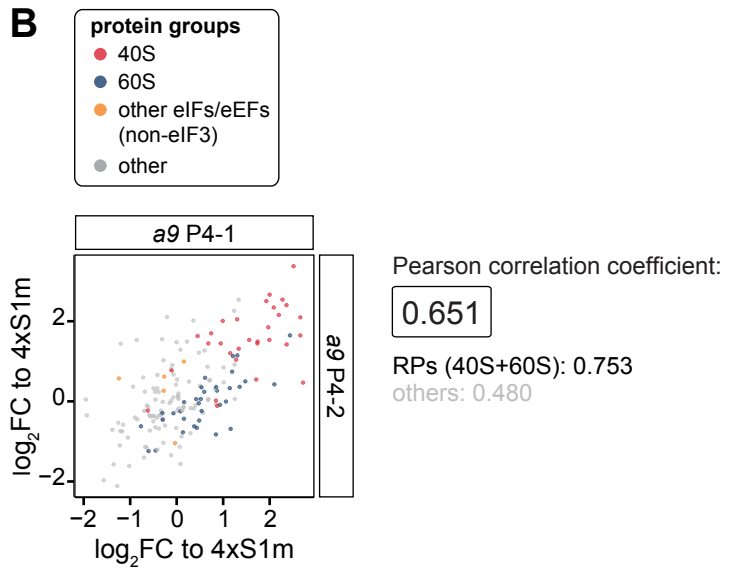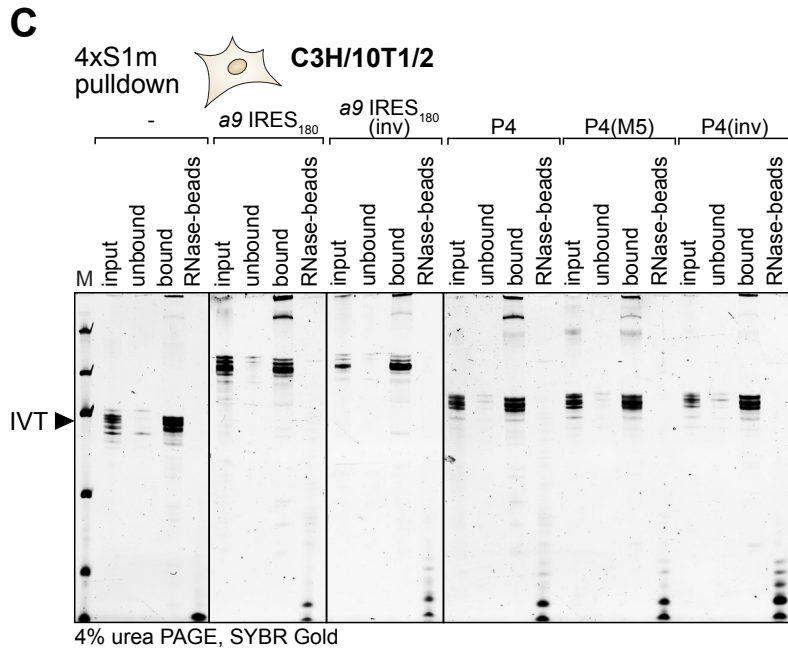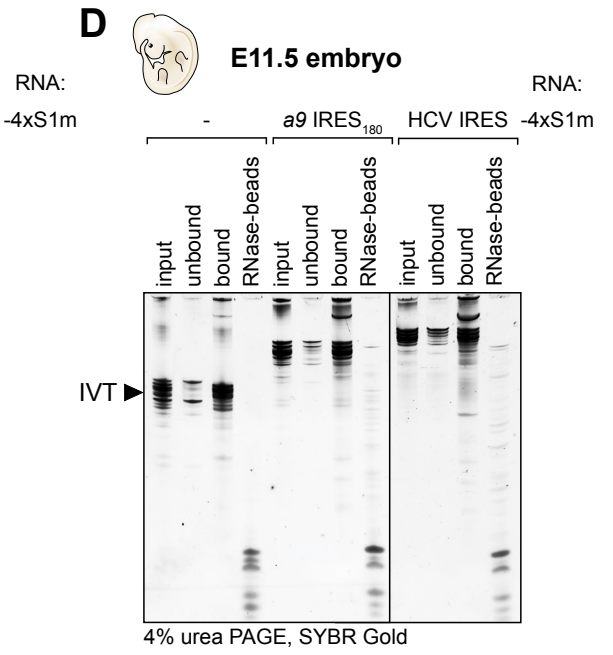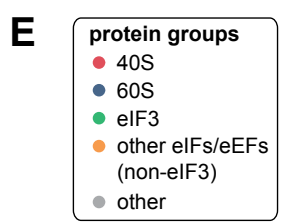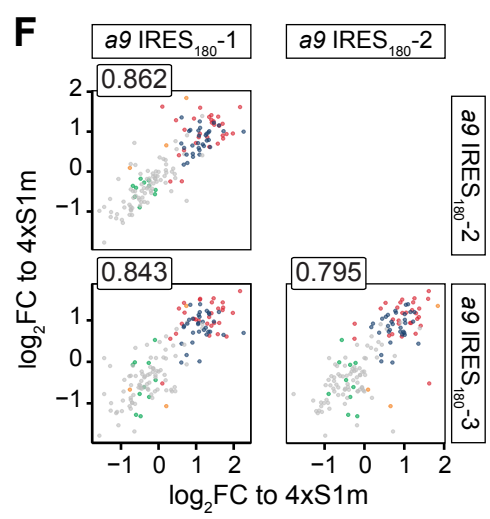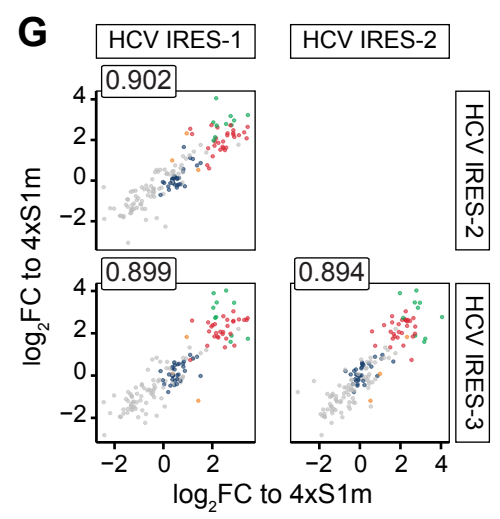

**Figure S2. The *Hoxa9* IRES-like element binds to the 40S ribosomal subunit via P4 and to the 80S ribosome. Related to Figure 3.**

(A) *In vitro* transcribed RNAs fused to 4xS1m aptamers were coupled to SA-sepharose beads for 4xS1m pulldown using untransfected C3H/10T1/2 cells as input. Coupled beads were incubated with cell extracts, washed and eluted using RNase A to release RNA-bound proteins. Input and unbound samples were taken before and after incubation of RNAs with beads. After incubation with extracts and wash steps, and before RNase A-elution, a “bound” fraction of the beads for each sample was saved. To monitor coupling efficiency, 10% of the input, unbound, and bound RNA fraction of each sample was resolved by 4% denaturing polyacrylamide/TBE/urea PAGE and visualized by SYBR Gold. Representative of  $n = 2$  is shown. Corresponds to **Figure 3B**.

(B) Correlation plot of TMT-MS/MS data from C3H/10T1/2 cells. Comparison of the pair of individual TMT-MS/MS samples (two replicate samples per RNA *a9* P4 bait). Scatter plot of  $\log_2$  fold change (FC) relative to the aptamer control (4xS1m) for *a9* P4, colored by protein group (see legend) and Pearson correlation coefficient for the whole data set and for RPs and other proteins. See also **Figure 3D, Table S4**.

(C) 4xS1m pulldown with *a9* IRES<sub>180</sub>- and P4-4xS1m as well as control constructs was performed as described in panel (A). Analysis of RNA fractions of beads after RNase A-treatment (RNase-beads) confirm complete digestion of coupled RNAs on beads. Representative of  $n = 3$  is shown. Corresponds to **Figure 3E**.

(D) The same 4xS1m pulldown experiment was carried out as described in panel (A), except that stage E11.5 FVB mouse embryos were used to generate cellular extracts. Analysis of RNA fractions of beads after RNase A-treatment (RNase-beads) confirm complete digestion of coupled RNAs on beads. Representative of  $n = 3$  is shown. Corresponds to **Figure 3F**.

(E) Protein groups for analysis of reproducibility of TMT-MS/MS data in (F) and (G).

(F) Correlation matrix of TMT-MS/MS data from stage E11.5 FVB mouse embryos. A matrix comparing every possible pair of individual TMT-MS/MS samples (three replicate samples per *a9* IRES<sub>180</sub> RNA bait). Scatter plots of  $\log_2$  fold change (FC) relative to the aptamer control (4xS1m) for *a9* IRES<sub>180</sub>, colored by protein group (E) and Pearson correlation coefficient for the whole data set is shown. See also **Figure 3G, Table S5**.

(G) Correlation matrix of TMT-MS/MS data from stage E11.5 FVB mouse embryos as in (F) for three replicate samples per HCV IRES RNA bait. See also **Figure 3G, Table S5**.

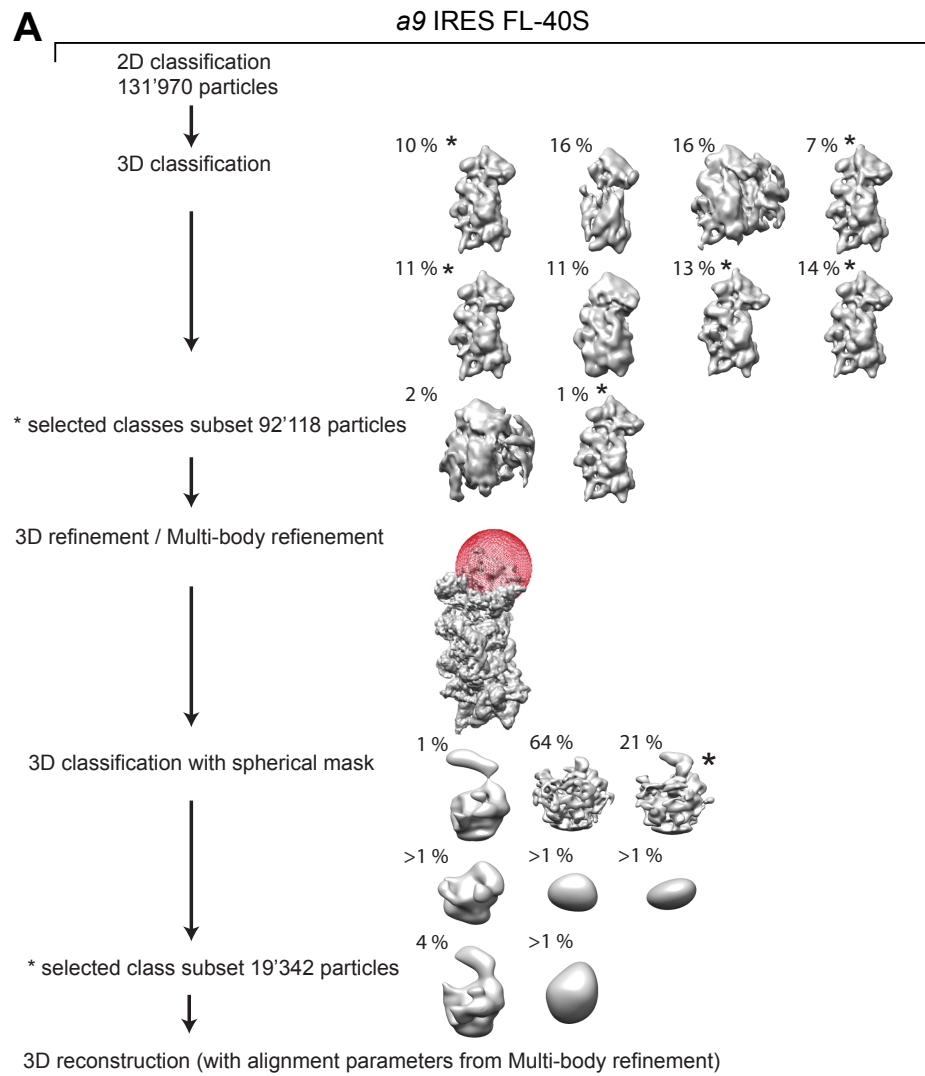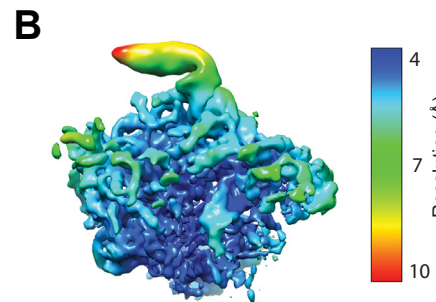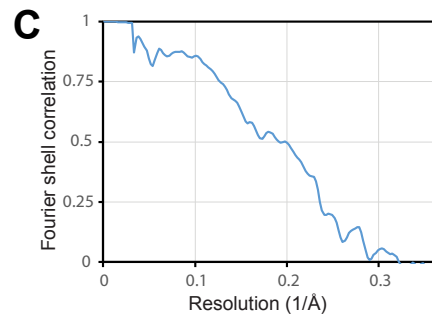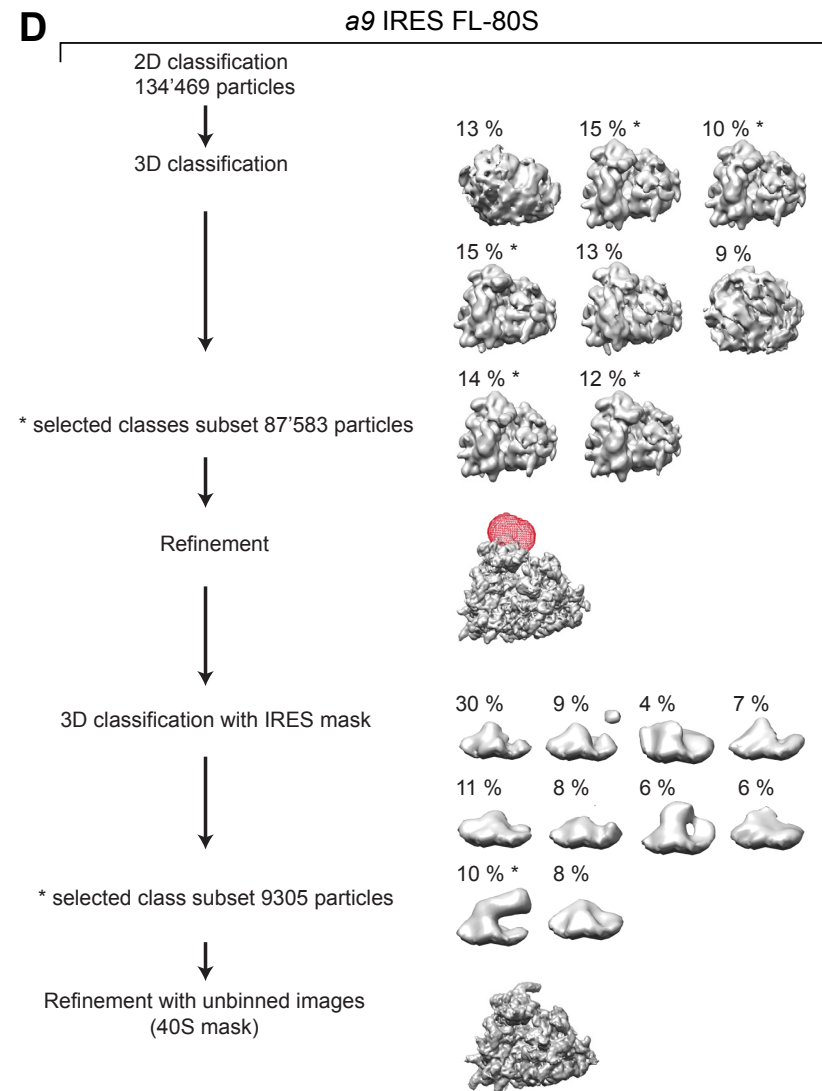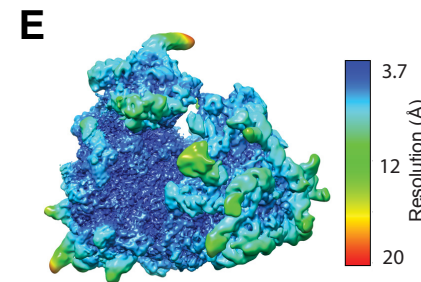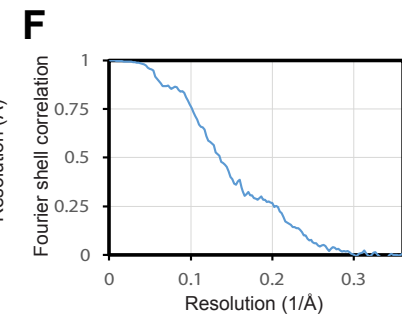

**Figure S3. Cryo-EM classification and refinement of the *a9* IRES FL in complex with 40S and 80S. Related to Figure 4.**

(A) Cryo-EM image classification and refinement for the *a9* IRES FL-40S subunit complex. Schematic representation of the 2D and 3D classification steps used to obtain the *a9* IRES FL-40S subunit complex. Corresponds to **Figure 4A**.

(B) Density of the 40S subunit head in complex with the *a9* IRES FL filtered to local resolution and color coded by local resolution value.

(C) Fourier shell resolution curve of the final 3D reconstruction of the *a9* IRES FL-40S subunit complex head density indicating an overall resolution of 3.9 Å.

(D) Cryo-EM image classification and refinement for the *a9* IRES FL-80S subunit complex. Schematic representation of the 2D and 3D classification steps used to obtain the *a9* IRES FL-80S subunit complex. Corresponds to **Figure 4B**.

(E) Density of the 80S ribosome in complex with the *a9* IRES FL filtered to local resolution and color coded by local resolution value.

(F) Fourier shell resolution curve of the final 3D reconstruction of the *a9* IRES FL-80S subunit complex head density indicating an overall resolution of 4.4 Å.



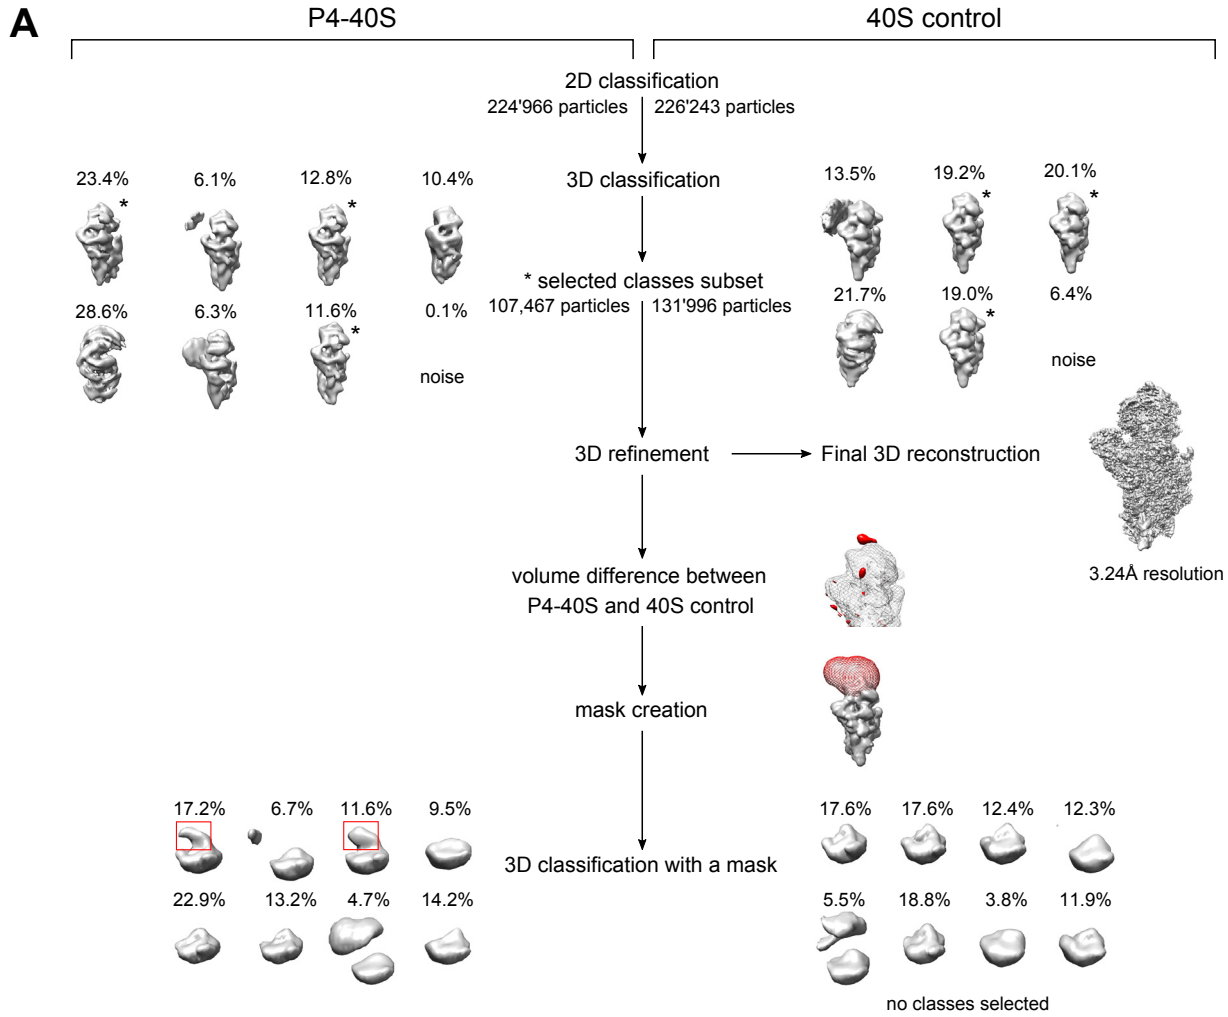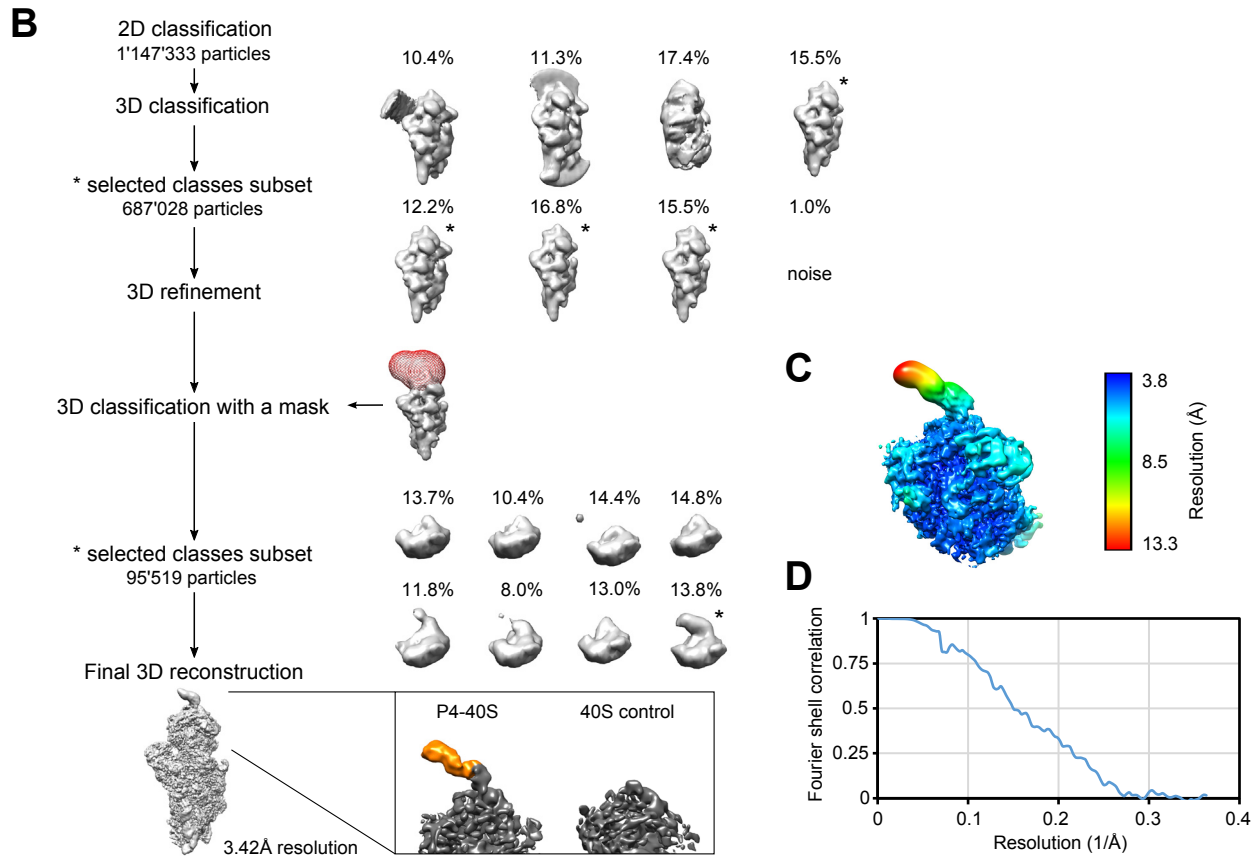

**Figure S4. Cryo-EM classification and refinement of the *Hoxa9* IRES-P4 in complex with 40S and 40S control. Related to Figure 4.**

(A) Processing scheme of the of P4-40S and 40S control cryo-EM datasets with similar number of particles upon 2D classification. Red squares indicate P4 density protrusions in P4-40S dataset which are not visible in the 40S control dataset.

(B) Processing scheme of the of whole P4-40S cryo-EM dataset. Further processing steps included multibody refinement, followed by a 3D classification on a P4 sub-region using a tighter mask. Surface representation of a final reconstruction, filtered to 7 Å resolution, clearly shows RNA features of the P4 on the 40S (colored orange) which are absent in control reconstruction of a 40S ribosomal subunit from human cells. Corresponds to **Figure 4C-E**.

(C) Density of the 40S ribosomal subunit in complex with *Hoxa9* IRES P4 element filtered to local resolution and color coded by local resolution value.

(D) Fourier shell resolution curve of the *Hoxa9* IRES P4-40S head reconstruction indicating an overall resolution of 4.1 Å.

**A NOY401**

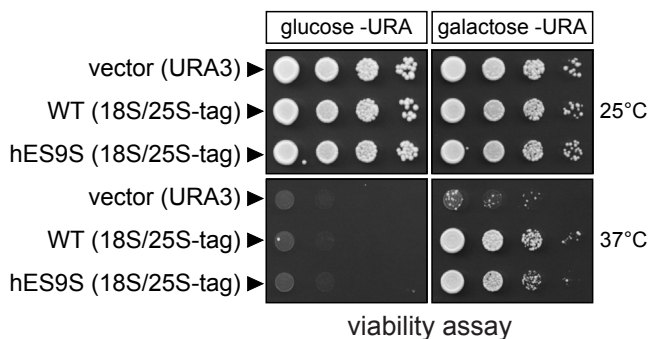

**B**

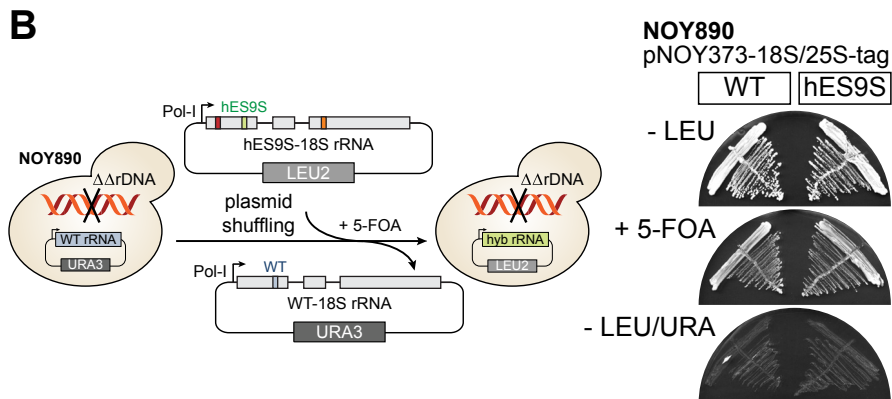

**C NOY890**

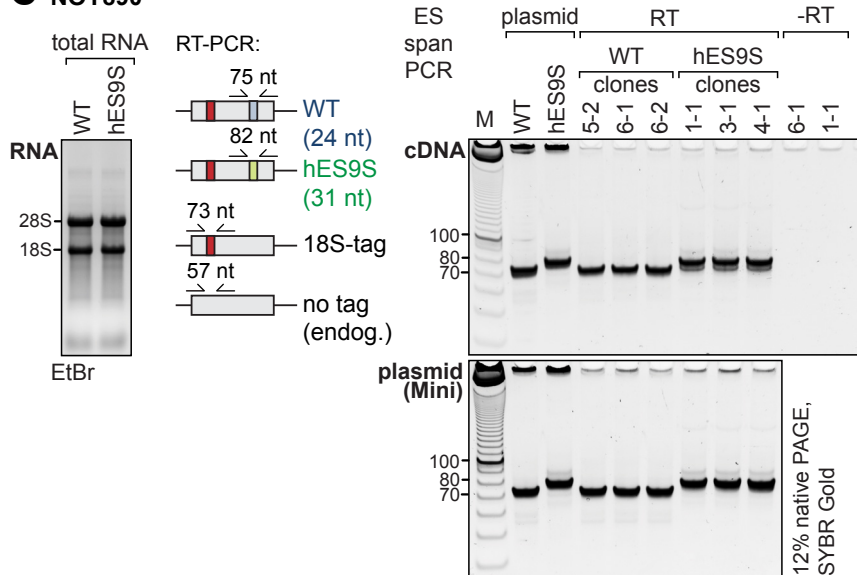

**D**

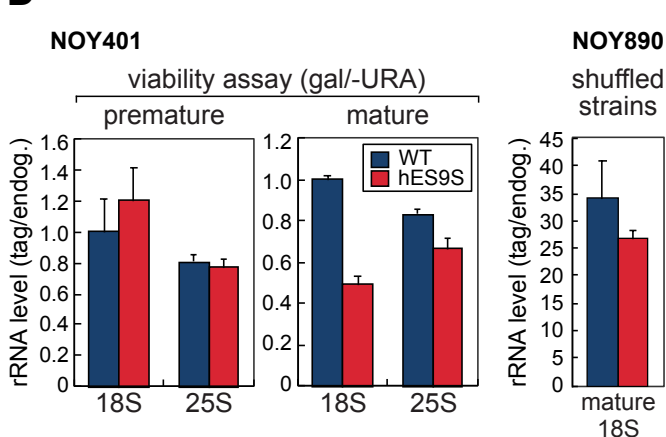

**E NOY890**

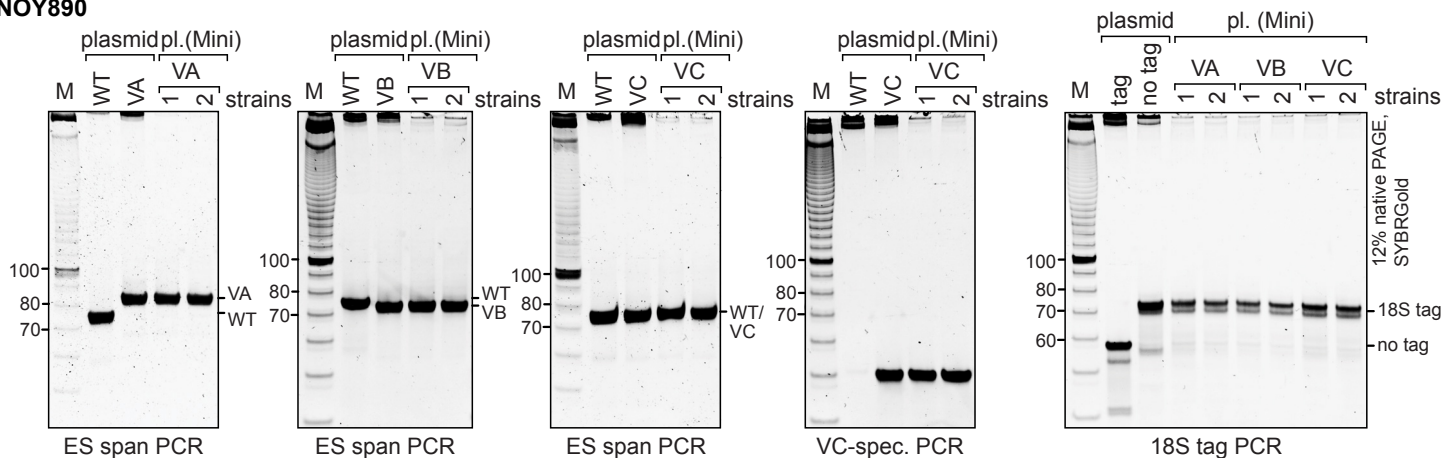

**F NOY401**

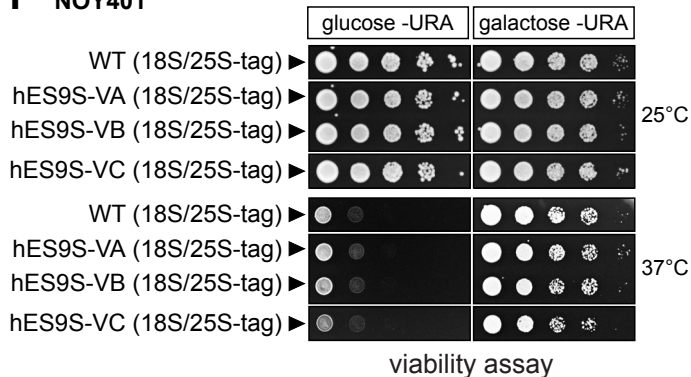

**G NOY401**

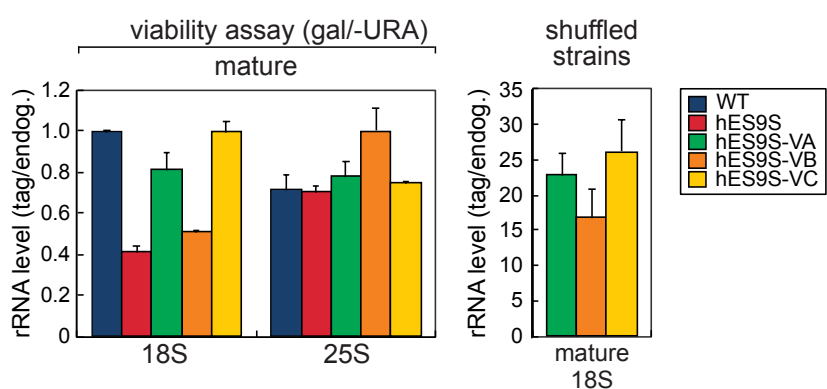

**Figure S5. Plasmid shuffling and yeast strain characterization. Related to Figure 5.**

(A) Viability of engineered yeast strains containing hES9S in their 18S rRNA was assayed in the NOY401 strain harboring a temperature-sensitive RNA polymerase I allele (pol I). The plasmid encoding hES9S-rDNA contains a uracil (*URA3*) marker. hES9S-rDNA expression is controlled by a GAL-promoter. Induced expression on galactose plates at restrictive temperature (37°C) supports growth of cells that can survive based on plasmid-provided rRNA. A *URA3* plasmid and a yeast WT rDNA plasmid serve as negative and positive controls, respectively. All rDNA plasmids contain 18S and 25S rRNA tags. Representative of  $n = 3$  is shown.

(B) (Right) Schematic of the plasmid shuffling approach to generate yeast strains (NOY890) that contain a homozygous knock-out of the rDNA locus and generate ribosomes exclusively from plasmids. Adapted from **Figure 5E**. (Left) Plasmid exchange from *URA3* (WT) to *LEU2* (tagged WT or hES9S)-plasmids in isolates is tested by growth on drop-out plates. Successful plasmid shuffling results in growth of isolates on SD-*LEU2*, and SD+5-FOA but not on SD-*LEU/URA*. Exemplary clones of WT and hES9S-containing rRNA strains were streaked out on respective plates and their growth was documented.

(C) RT-PCR analysis using ES9S-specific primers that span ES9S allow analysis of expression of WT or hES9S 18S rRNA due to a PCR product of 7 nt difference in length between WT and hES9S (ES span PCR). Similarly, the presence of the 18S tag can be distinguished from WT rRNA (18S tag PCR). Total RNA for cDNA synthesis or plasmid DNA was extracted from clones and used for RT-PCR. Plasmid-derived PCR products serve as controls. PCR products were resolved by 12% native PAGE and stained with SYBR Gold. Three clones (NOY890) used in this study are presented. 2  $\mu$ g total RNA of WT and hES9S strains was resolved on a 1.2% denaturing agarose gel to assess rRNA processing. A 10 bp DNA ladder (Invitrogen) was loaded as reference.

(D) Yeast cells (NOY401) for the viability assay (A) were harvested at  $OD_{600} = 1.0$  after overnight induction in galactose-media at RT and subjected to total RNA extraction ( $n = 3$ , SD). For the viability assay, RT-qPCR analysis using specific primers for rRNA tags and endogenous rRNA assesses the degree of processing from premature to mature rRNA for 18S and 25S. For yeast strain characterization after plasmid shuffling and isolation of clones, this tag/endogenous rRNA ratio assesses the substitution rate of WT with tagged-WT or tagged-hES9S ribosomes present in isolated strains. For NOY890 strains, for 33 and 26 tagged WT and hES9S ribosomes, respectively, one endogenous plasmid-derived WT 40S ribosome is left in the cell.

(E) Same RT-PCR analysis as in (C) was performed using ES9S-specific primers that span ES9S (ES span PCR) and primers for the 18S tag (18S tag PCR) for the characterization of the hES9S-variant strains VA-VC. Plasmid DNA was extracted from clones and used for RT-PCR. Plasmid-derived PCR products serve as controls. Two clones (NOY890) used in this study are presented. A 10 bp DNA ladder (Invitrogen) was loaded as reference.

(F) Viability of engineered yeast strains containing hES9S-VA, -VB, or -VC in their 18S rRNA was assayed in the NOY401 strain harboring a temperature-sensitive RNA pol I as in (A). A yeast WT rDNA plasmid serve as positive control. All rDNA plasmids contain 18S and 25S rRNA tags. Representative of  $n = 3$  is shown.

(G) Yeast cells (NOY401) for the viability assay (F) were harvested at  $OD_{600} = 1.0$  after overnight induction in galactose-media at RT and subjected to total RNA extraction ( $n = 3$ , SD) as in (D). For the viability assay, RT-qPCR analysis using specific primers for rRNA tags and endogenous rRNA assesses the degree of processing to mature rRNA for 18S and 25S. For NOY890 strains after plasmid shuffling, for 22, 17 and 24 tagged hES9S-VA, -VB and -VC ribosomes, respectively, one endogenous plasmid-derived WT 40S ribosome is left in the cell.

### A NOY890

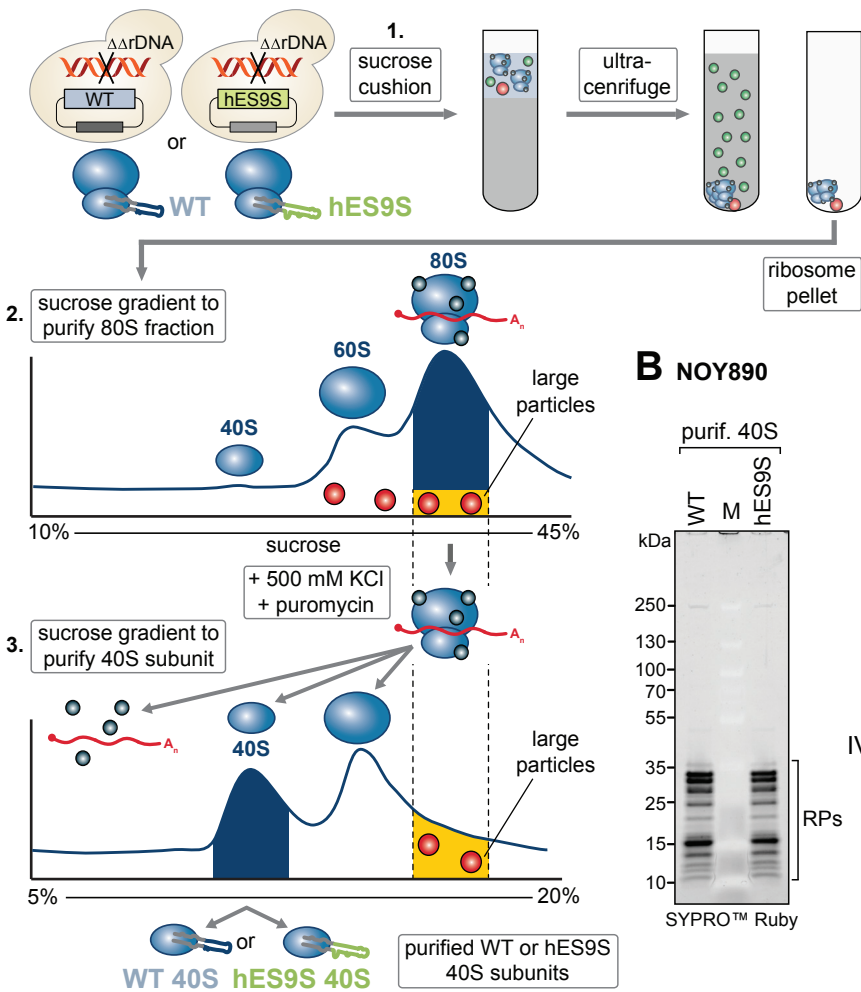

### B NOY890

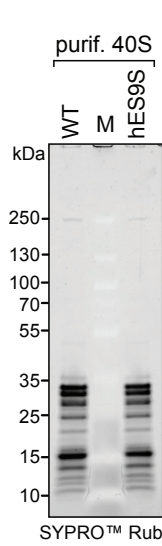

### E P4-4xS1m

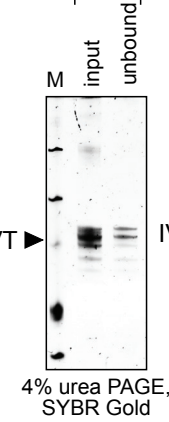

### F

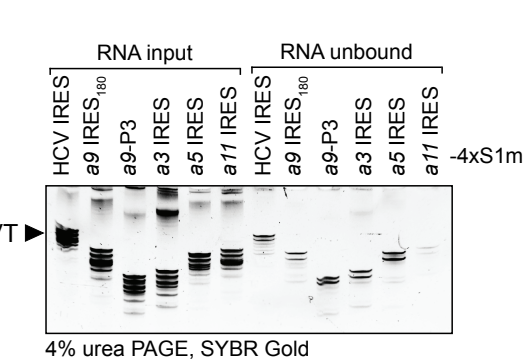

### C 4xS1m pulldown

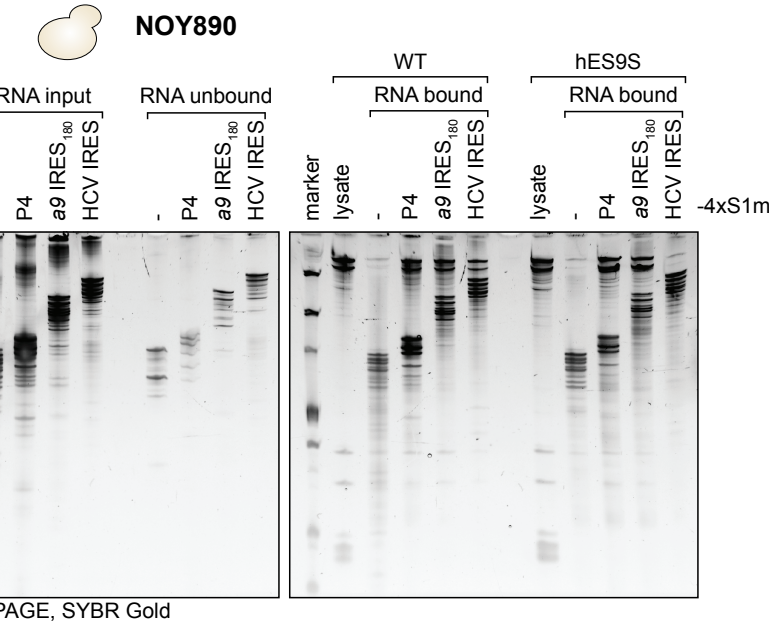

### G Hoxa IRES-like elements

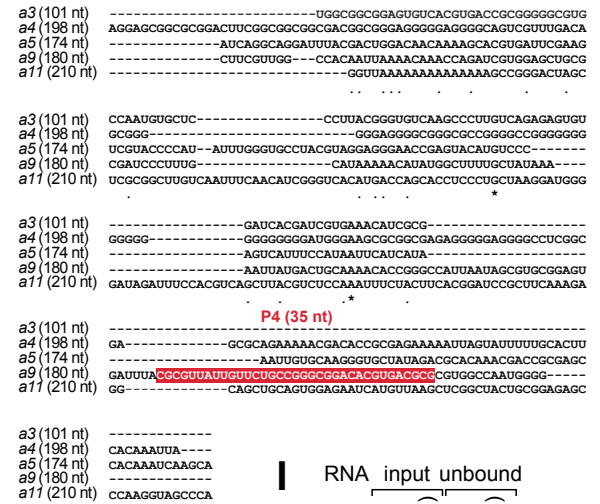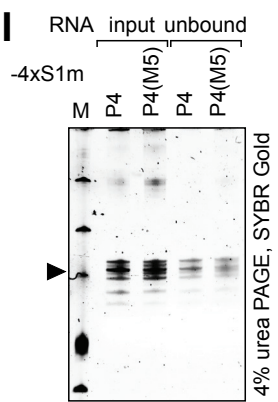

### H Hoxa3

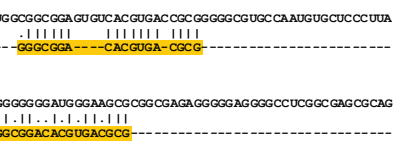

### Hoxa5

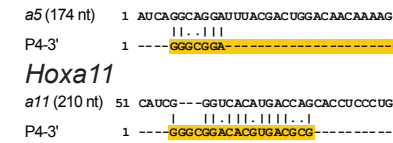

**Figure S6. Purification of WT and hES9S 40S ribosomal subunits from yeast and 4xS1m pulldown of yeast WT and hES9S ribosomes with IRES-like elements. Related to Figure 4, 6, 7.**

(A) Purification scheme for 40S ribosomal subunit isolation from WT and hES9S yeast strains (NOY890) by sequential sucrose cushion (1.) and gradient centrifugation (2. and 3.). First, ribosomes from yeast cell lysates derived from either WT or hES9S humanized yeast strains were pelleted by ultracentrifugation on a sucrose cushion (1.), the ribosome pellet is loaded onto a 10-45% sucrose gradient (2.) and the 80S ribosomal fractions are treated with high salt and puromycin to split them into 40S and 60S. A second 5-20% gradient fractionation (3.) of individual subunits separated 40S subunits from free mRNA and proteins, 60S, and large particles.

(B) SDS-PAGE analysis and SYPRO-Ruby staining of purified 40S ribosomal subunits from WT and hES9S yeast strains indicates similar purity and ribosomal protein (RP) enrichment in both 40S fractions (10-35 kDa range). See also corresponding WB analysis in **Figure 5F**.

(C) A similar 4xS1m pulldown experiment was carried out as described in **Figure S2A**, except that tagged-WT or tagged-hES9S ribosome expressing yeast strains were used to generate cellular extracts. Input and unbound RNA samples were taken before and after incubation of RNAs with beads. To monitor coupling efficiency, 10% of the input and unbound RNA fraction of each sample was resolved by 4% denaturing polyacrylamide/TBE/urea PAGE and visualized by SYBR Gold staining. Representative of  $n = 3$  is shown. Corresponds to **Figure 6B**. Low Range ssRNA Ladder (NEB) was loaded for reference.

(D) The extended data for the WB in **Figure 6B** and the corresponding RNA gel in (C) demonstrates the improved specificity of the RNase A elution over elution of the beads by SDS-containing sample buffer (SDS) in the 4xS1m pulldown experiment. PGK1 serves as a negative control. Representative of  $n = 3$  is shown.

(E) A similar 4xS1m pulldown experiment as described in (C) was performed with the focus on the hES9S-variant VA-VC comparison and 4% urea PAGE analysis of RNA input and unbound samples. Corresponds to **Figure 6D**.

(F) A similar 4xS1m pulldown experiment with the focus on the *Hoxa* IRES-like comparison and 4% urea PAGE analysis of RNA input and unbound samples was performed as described in (C). Corresponds to **Figure 6E**.

(G) Alignment of full-length *Hoxa* IRES-like element sequences. IRES lengths are given in nts. The P4 in *a9* is indicated in red.

(H) Alignments of the P4-3' motif (indicated in yellow) to individual full-length *Hoxa* IRES sequences.

(I) A similar 4xS1m pulldown experiment with the focus on the comparison of P4 to P4(M5) and 4% urea PAGE analysis of RNA input and unbound samples was performed as described in (C). Representative of  $n = 4$  is shown. Corresponds to **Figure 7B**.

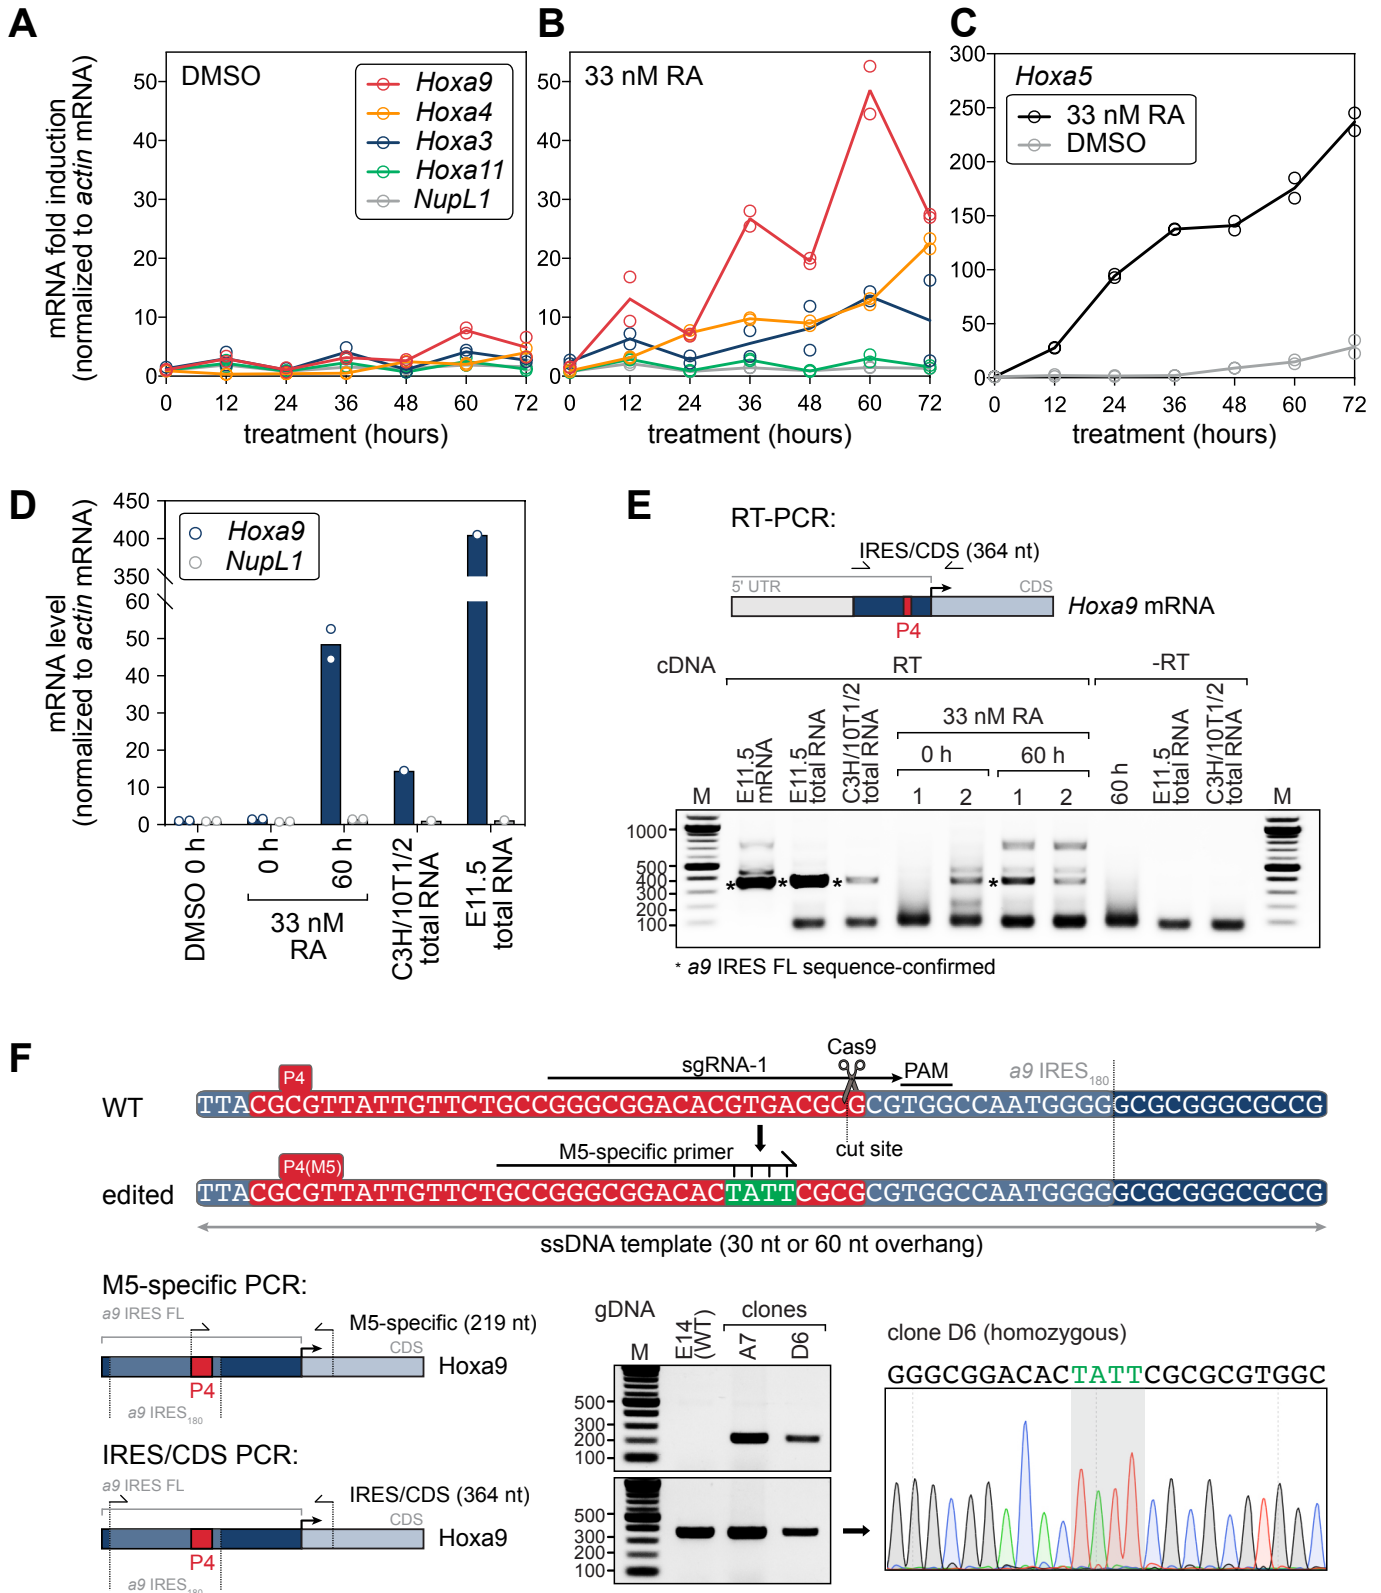

**Figure S7. Induction of HoxA genes in mESCs by retinoic acid treatment and CRISPR/Cas9-editing of M5 into the HoxA9 gene. Related to Figure 7.**

(A) For Hox gene induction, mES cells were treated with DMSO alone as a negative control (A) or with 33 nM retinoic acid (RA) in DMSO (B, C). An RA concentration of 33 nM closely mimicked physiological oscillation of Hox gene induction (De Kumar et al., 2015). Fresh media with RA was provided every 12 hours and cells were harvested in 12 hour-intervals for 0-72 hours for time course experiments, and subjected to RNA extraction and RT-qPCR. mRNA fold induction is expressed as mRNA levels of *Hoxa* or *NupL1* as a control normalized to respective *actin* mRNA levels. Sample DMSO, 0 hours was set to 1 for each mRNA, n = 2.

(D) Comparison of expression levels of *Hoxa9* and *NupL1* mRNAs relative to *actin* mRNA in RA or DMSO-treated mES cells, C3H/10T1/2 cells, and stage E11.5 FVB mouse embryos using DNase-treated total RNA as input. Sample DMSO, 0 hours was set to 1, n = 1-2.

(E) RT-PCR analysis of the *Hoxa9* IRES in the 5' UTR of *Hoxa9* mRNA as induced by RA-treatment. DNase-treated total RNA or mRNA as in (D) was used for RT using random hexamers and primers flanking the IRES 5' and priming off the *a9* CDS 3', respectively. This resulted in a PCR product of 364 nts as indicated in the schematic. Bands indicated with asterisks were gel-extracted and sequenced and confirm that the *a9* mRNA induced upon 60 hours of RA-treatment contains the IRES as annotated, identical to in mouse embryos and C3H/10T1/2 cells. For 0 and 60 hours of RA, two biological replicates were tested (1, 2). Primers are given in **Table S3**.

(F) Schematic of the targeted CRISPR/Cas9 genome editing of P4(M5) into the *Hoxa9* locus in mESCs using guide RNAs that cut very close to the M5 site and single-stranded DNA donor templates (ssDNA) that have either 30 or 60 nt overhangs 5' and 3' of the 4-nt M5 mutation (TATT). We used three different guide RNAs, of which sgRNA-1 was the most efficient (cut site depicted). Two genotyping strategies were designed to characterize successful editing in isolated clones after genomic DNA (gDNA) extraction. The first PCR amplifies only M5-edited regions (M5-specific PCR, 219 nt, KL606/597) whereby the forward primer primes off the 4-nt M5 mutation and only yields a product if editing has occurred. The second PCR is a M5-spanning PCR (IRES/CDS PCR, 364 nt, KL596/597) that contains the edit site in the center and should always yield a product and was used for sequence confirmation by Sanger sequencing using both outer primers. This PCR strategy identified two positive clones in comparison to unedited WT cells (E14) of which D6 is a homozygous clone generated with sgRNA-1 and the 60 nt-overhang ssDNA. The chromatogram after Sanger sequencing is shown for clone D6 indicating scarless, homozygous editing of M5 (TATT) into the *Hoxa9* locus.



## SUPPLEMENTAL TABLES

**Table S1: Plasmids used in this study. Related to STAR Methods.**

All plasmids used for *in vitro* transcription and mammalian transient transfection or yeast transformation are listed in the table.

| <b>Table S1. List of plasmids</b>               |                                               |                              |
|-------------------------------------------------|-----------------------------------------------|------------------------------|
| <b>Plasmid</b>                                  | <b>Notes</b>                                  | <b>Reference</b>             |
| <b><i>In vitro</i> transcription constructs</b> |                                               |                              |
| pSP73                                           | SP6 promoter, kindly provided by G. Stoecklin | Promega                      |
| pSP73-4xS1m                                     | p2880, kindly provided by G. Stoecklin        | (Leppek and Stoecklin, 2014) |
| pSP73-4xS1m(MCS)                                |                                               | This study                   |
| pSP73-a9(5' UTR)-4xS1m(MCS)                     |                                               | This study                   |
| pSP73-a9(IRES)-4xS1m(MCS)                       |                                               | This study                   |
| pSP73-a9(P3)-4xS1m(MCS)                         |                                               | This study                   |
| pSP73-a9(P4)-4xS1m(MCS)                         |                                               | This study                   |
| pSP73-a3(IRES)-4xS1m(MCS)                       |                                               | This study                   |
| pSP73-a5(IRES)-4xS1m(MCS)                       |                                               | This study                   |
| pSP73-a9(IRES) <sub>180</sub> -4xS1m(MCS)       |                                               | This study                   |
| pSP73-a11(IRES)-4xS1m(MCS)                      |                                               | This study                   |
| pSP73-HCV IRES-4xS1m(MCS)                       |                                               | This study                   |
| pSP73-a9(P4(M5))-4xS1m(MCS)                     |                                               | This study                   |
| <b><i>Mammalian cells</i></b>                   |                                               |                              |
| <b>Expression constructs</b>                    |                                               |                              |
| pRF                                             | SV40 promoter, kindly provided by D. Ruggero  |                              |
| pRF-HCV IRES                                    | kindly provided by D. Ruggero                 |                              |
| pRF-EMCV IRES                                   | kindly provided by D. Ruggero                 |                              |
| pRL                                             | SV40 promoter, Renilla luciferase             | Promega                      |
| pGL3                                            | SV40 promoter, Firefly luciferase             | Promega                      |
| pGL3-HBB                                        |                                               | (Xue et al., 2015)           |
| pRF-a9 5' UTR                                   |                                               | (Xue et al., 2015)           |
| pRF-a9-IRES FL                                  |                                               | (Xue et al., 2015)           |
| pFLB (pcDNA3-Fluc- $\beta$ -globin)             | p2524, CMV promoter                           | (Ozgur et al., 2010)         |
| pRF-actin                                       | mouse $\beta$ -actin 5' UTR                   | This study                   |
| pRF-a9-IRES <sub>180</sub>                      |                                               | This study                   |
| pRF-actin-a9-IRES <sub>180</sub>                |                                               | This study                   |
| pRF-a9-IRES <sub>180</sub> -actin               |                                               | This study                   |
| pRF-a9-IRES <sub>180</sub> (M5)-actin           |                                               | This study                   |
| pRF-a9-P3                                       |                                               | This study                   |
| pRF-a9-P3-actin                                 |                                               | This study                   |
| pRF-a9-P4                                       |                                               | This study                   |
| pRF-a9-P4-actin                                 |                                               | This study                   |

|                                      |                                                                 |                       |
|--------------------------------------|-----------------------------------------------------------------|-----------------------|
| pRF-a9-P4(M5)-actin                  |                                                                 | This study            |
| pRF-a9-P4-native                     |                                                                 | This study            |
| pRF-a9-P4(M1-M11)-native             | P4 mutagenesis series M1-M11                                    | This study            |
| pRF-a9-native                        |                                                                 | This study            |
| pRF-actin(inv)                       | mouse $\beta$ -actin 5' UTR, inverse sequence                   | This study            |
| pRF-a9-P4-actin(inv)                 |                                                                 | This study            |
| pRF-a9-P4(M11-M11)-actin(inv)        | P4 mutagenesis series M1-M11                                    | This study            |
| pGL3-FLB-stop                        | based on pGL3-(EcoRV)                                           | This study            |
| pGL3-FLB-stop-TIE                    |                                                                 | This study            |
| pGL3-FLB-stop-TIE-a9 IRES FL         |                                                                 | This study            |
| pGL3-FLB-stop-TIE-native             |                                                                 | This study            |
| pGL3-FLB-stop-TIE-P4-native          |                                                                 | This study            |
| pGL3-FLB-stop-TIE-P4(M5)-native      |                                                                 | This study            |
| pGL3-FLB-stop-TIE-HCV                |                                                                 | This study            |
| <b>RNA transfection</b>              |                                                                 |                       |
| pcDNA3.1-5'UTR-3xHA-Nluc             | 46 nt scrambled UTR, kindly provided by C. Howard               | (Osuna et al., 2017)  |
| pcDNA3.1-actin(inv)-3xHA-Nluc        |                                                                 | This study            |
| pcDNA3.1-P4-actin(inv)-3xHA-Nluc     |                                                                 | This study            |
| pcDNA3.1-P4(M5)-actin(inv)-3xHA-Nluc |                                                                 | This study            |
| <b>CRISPR/Cas9 genome editing</b>    |                                                                 |                       |
| pX459-pSpCas9(BB)-2A-Puro-V2.0       |                                                                 | Addgene #62988        |
| pX459-a9(M5)-sgRNA-1                 |                                                                 | This study            |
| <b>Yeast</b>                         |                                                                 |                       |
| <b>rDNA constructs</b>               |                                                                 |                       |
| pNOY102                              | <i>URA3, 2<math>\mu</math>, Gal7-rDNA-WT rRNA, amp</i>          | (Nogi et al., 1991)   |
| pNOY102-18S25Stag                    | <i>URA3, 2<math>\mu</math>, Gal7-rDNA-tagged rRNA</i>           | (Fujii et al., 2009)  |
| pNOY102-18S25Stag-hES9S              | <i>URA3, 2<math>\mu</math>, Gal7-rDNA-tagged rRNA-hES9S</i>     | This study            |
| pNOY102-18S25Stag-hES9S-VA           | <i>URA3, 2<math>\mu</math>, Gal7-rDNA-tagged rRNA-hES9S-VA</i>  | This study            |
| pNOY102-18S25Stag-hES9S-VB           | <i>URA3, 2<math>\mu</math>, Gal7-rDNA-tagged rRNA-hES9S-VB</i>  | This study            |
| pNOY102-18S25Stag-hES9S-VC           | <i>URA3, 2<math>\mu</math>, Gal7-rDNA-tagged rRNA-hES9S-VC</i>  | This study            |
| pNOY373                              | <i>LEU2, 2<math>\mu</math>, Pol1-rDNA-WT rRNA, amp</i>          | (Nemoto et al., 2010) |
| pNOY373-18S25Stag                    | <i>LEU2, 2<math>\mu</math>, Pol1-rDNA- tagged rRNA</i>          | This study            |
| pNOY373-18S25Stag-hES9S              | <i>LEU2, 2<math>\mu</math>, Pol1-rDNA- tagged rRNA-hES9S</i>    | This study            |
| pNOY373-18S25Stag-hES9S-VA           | <i>LEU2, 2<math>\mu</math>, Pol1-rDNA- tagged rRNA-hES9S-VA</i> | This study            |
| pNOY373-18S25Stag-hES9S-VB           | <i>LEU2, 2<math>\mu</math>, Pol1-rDNA- tagged rRNA-hES9S-VB</i> | This study            |
| pNOY373-18S25Stag-hES9S-VC           | <i>LEU2, 2<math>\mu</math>, Pol1-rDNA- tagged rRNA-hES9S-VC</i> | This study            |
| <b>Expression construct</b>          |                                                                 |                       |
| pRS316                               | <i>URA3, CEN</i>                                                | Addgene #77145        |

**Table S2: Yeast strains used in this study. Related to STAR Methods.**

All yeast strains used and/or generated for this study are listed in the table.

| <b>Table S2. List of yeast strains</b> |                                                                                                                       |                       |
|----------------------------------------|-----------------------------------------------------------------------------------------------------------------------|-----------------------|
| <b>Strain</b>                          | <b>Genotype and Notes</b>                                                                                             | <b>Reference</b>      |
| NOY401                                 | <i>MATA rpa190-3 ura3-1 leu2-3 trp1-1 can1-100</i>                                                                    | (Nogi et al., 1991)   |
| NOY401<br>WT rRNA                      | <i>MATA rpa190-3 ura3-1 leu2-3 trp1-1 can1-100 carrying pNOY102-WT rRNA::URA3</i>                                     | This study            |
| NOY401<br>tagged-hES9S                 | <i>MATA rpa190-3 ura3-1 leu2-3 trp1-1 can1-100 carrying pNOY102-tagged rRNA-hES9S::URA3</i>                           | This study            |
| NOY401<br>tagged-hES9S-VA              | <i>MATA rpa190-3 ura3-1 leu2-3 trp1-1 can1-100 carrying pNOY102-tagged rRNA-hES9S-VA::URA3</i>                        | This study            |
| NOY401<br>tagged-hES9S-VB              | <i>MATA rpa190-3 ura3-1 leu2-3 trp1-1 can1-100 carrying pNOY102-tagged rRNA-hES9S-VB::URA3</i>                        | This study            |
| NOY401<br>tagged-hES9S-VC              | <i>MATA rpa190-3 ura3-1 leu2-3 trp1-1 can1-100 carrying pNOY102-tagged rRNA-hES9S-VC::URA3</i>                        | This study            |
| KAY488<br>(NOY890)                     | <i>MATA ura3-1 leu2-3,112 his3-11 trp1-1 ade2-1 can1-100 rdnaΔΔ::HIS3 carrying pRDN-hyg::URA3</i>                     | (Nemoto et al., 2010) |
| NOY890<br>WT rRNA                      | <i>MATA ura3-1 leu2-3,112 his3-11 trp1-1 ade2-1 can1-100 rdnaΔΔ::HIS3 carrying pNOY373-WT rRNA::LEU2</i>              | This study            |
| NOY890<br>tagged-hES9S                 | <i>MATA ura3-1 leu2-3,112 his3-11 trp1-1 ade2-1 can1-100 rdnaΔΔ::HIS3 carrying tagged pNOY373-rRNA-hES9S::LEU2</i>    | This study            |
| NOY890<br>tagged-hES9S-VA              | <i>MATA ura3-1 leu2-3,112 his3-11 trp1-1 ade2-1 can1-100 rdnaΔΔ::HIS3 carrying tagged pNOY373-rRNA-hES9S-VA::LEU2</i> | This study            |
| NOY890<br>tagged-hES9S-VB              | <i>MATA ura3-1 leu2-3,112 his3-11 trp1-1 ade2-1 can1-100 rdnaΔΔ::HIS3 carrying tagged pNOY373-rRNA-hES9S-VB::LEU2</i> | This study            |
| NOY890<br>tagged-hES9S-VC              | <i>MATA ura3-1 leu2-3,112 his3-11 trp1-1 ade2-1 can1-100 rdnaΔΔ::HIS3 carrying tagged pNOY373-rRNA-hES9S-VC::LEU2</i> | This study            |

**Table S3: DNA Oligonucleotides used in this study. Related to STAR Methods.**

All DNA oligonucleotides used for cloning, RT-PCR, and RT-qPCR are listed in the table. F, forward primer; R, reverse primer.

| <b>Table S3. DNA oligonucleotides</b>                                         |                              |                               |
|-------------------------------------------------------------------------------|------------------------------|-------------------------------|
| <b>Name</b>                                                                   | <b>Sequence</b>              | <b>Description</b>            |
| <b><i>qPCR primer</i></b>                                                     |                              |                               |
| KL050                                                                         | TGGAGAATAACTTCTTCGTGGA       | Rluc qPCR F                   |
| KL051                                                                         | TTGGACGACGAACTTCACC          | Rluc qPCR R                   |
| KL052                                                                         | AAGAGATACGCCCTGGTTC          | Fluc qPCR F                   |
| KL053                                                                         | TTGTATTTCAGCCCATATCGTTTC     | Fluc qPCR R                   |
| KL056                                                                         | GCCAACCGTGAAAAGATGAC         | mouse $\beta$ -actin F        |
| KL057                                                                         | CATCACAATGCCTGTGGTAC         | mouse $\beta$ -actin R        |
| KL075                                                                         | GAAGGCTCATGGCAAGAAGG         | rabbit $\beta$ -globin qPCR F |
| KL076                                                                         | ATGATGAGACAGCACAATAACCAG     | rabbit $\beta$ -globin qPCR R |
| KL318                                                                         | TGCAAACTCCTTGGTCACAC         | y-UsnRNA1(SNR19) qPCR F       |
| KL319                                                                         | CAAACCTTCTCCAGGCAGAAG        | y-UsnRNA1(SNR19) qPCR R       |
| KL320                                                                         | CCATCATGAAGTGTGATGTC         | y-actin1 qPCR F               |
| KL321                                                                         | GACCTTCATGGAAGATGGAG         | y-actin1 qPCR R               |
| KL412                                                                         | CATGGCTGCAACACTTACACAGCA     | mouse <i>NupL1</i> qPCR F     |
| KL413                                                                         | ATTGCAAGCCAGTGCCAATACCTG     | mouse <i>NupL1</i> qPCR R     |
| KL109                                                                         | AAAAACAACCCAGCGAAGGC         | mouse <i>Hoxa9</i> qPCR F     |
| KL110                                                                         | ATCGCTTCTTCCGAGTGGAG         | mouse <i>Hoxa9</i> qPCR R     |
| KL400                                                                         | GGGAGCCGCGGTCTGA             | mouse <i>Hoxa3</i> qPCR F     |
| KL401                                                                         | ACATGGAGGGAGCCATTTTTCA       | mouse <i>Hoxa3</i> qPCR R     |
| KL402                                                                         | GAAGAAGATCCACGTGAGCG         | mouse <i>Hoxa4</i> qPCR F     |
| KL403                                                                         | GGGTCAGGTAGCGGTTAAAGT        | mouse <i>Hoxa4</i> qPCR R     |
| KL404                                                                         | GCGCAAGCTGCACATTAGTC         | mouse <i>Hoxa5</i> qPCR F     |
| KL405                                                                         | TCAGGTAGCGGTGAAGTGG          | mouse <i>Hoxa5</i> qPCR R     |
| KL406                                                                         | GGCCACACTGAGGACAAGG          | mouse <i>Hoxa11</i> qPCR F    |
| KL407                                                                         | GAACTCTCGCTCCAGCTCTC         | mouse <i>Hoxa11</i> qPCR R    |
| KL585                                                                         | CCGTATGAAGTCTGAGCGG          | Nanoluc qPCR F                |
| KL586                                                                         | CAGTGTGCCATAGTGCAGGA         | Nanoluc qPCR R                |
| KL641                                                                         | AGTGATTTACGCGTTATTGTTCTGCC   | native qPCR F                 |
| KL642                                                                         | TGTAACAACCTTGGTGGCACCAG      | native qPCR R                 |
| <b><i>qPCR primer for rRNA detection</i></b>                                  |                              |                               |
| KL300                                                                         | CTAGGCGAACAATGTTCTTAAAG      | pre-mature 25S rRNA F         |
| KL301                                                                         | GACCTCAAATCAGGTAGGAGTACCC    | mature 25S rRNA F             |
| KL302                                                                         | CACCGAAGGTACTACTCGAGAGCTTC   | tagged 25S rRNA R             |
| KL303                                                                         | CACCGAAGGTACCAGATTTC         | endogenous 25S rRNA R         |
| KL304                                                                         | GCTTGTTGCTTCTTCTTTTAAGATAG   | pre-mature 18S rRNA F         |
| KL305                                                                         | TACAGTGAACTGCGAATGGC         | mature 18S rRNA F             |
| KL306                                                                         | ATCTCTTCCAAAGGGTCGAG         | endogenous 18S rRNA R         |
| KL307                                                                         | CGAGGATTCAGGCTTTGG           | tagged 18S R                  |
| <b><i>PCR primer for rRNA strain characterization and ES9S sequencing</i></b> |                              |                               |
| KL314                                                                         | GAACGAGACCTTAACCTACTAAATAGT  | ES9S-span RT-PCR F            |
| KL315                                                                         | AAACCGATAGTCCCTCTAAGAAGT     | ES9S-span RT-PCR R            |
| KL316                                                                         | GCTAATACATGCTTAAATCTCGA      | 18Stag-span RT-PCR F          |
| KL317                                                                         | TTTTTATCTAATAAATACATCTCTCCAA | 18Stag-span RT-PCR R          |

|                                                                       |                                                                                                                                            |                            |
|-----------------------------------------------------------------------|--------------------------------------------------------------------------------------------------------------------------------------------|----------------------------|
| KL394                                                                 | GTGGTGCTAGCGCGG                                                                                                                            | ES9S-VC-span RT-PCR F      |
| KL473                                                                 | TCGATTCCGTGGGTGGTGG                                                                                                                        | 18S rRNA-seq primer F      |
| KL474                                                                 | TAGCGCGCGTGCAGC                                                                                                                            | 18S rRNA-seq primer R      |
| <b><i>IRES confirmation in mouse embryos and RA-treated mESCs</i></b> |                                                                                                                                            |                            |
| KL596                                                                 | CTTCGTTGGCCACAATTAAAACAAACCAG                                                                                                              | a9 IRES primer (mouse) F   |
| KL597                                                                 | GCCCAGCAGGAAGGAGTC                                                                                                                         | a9 CDS primer (mouse) R    |
| <b><i>CRISPR/Cas9-editing of P4(M5) and genotyping</i></b>            |                                                                                                                                            |                            |
| KL598                                                                 | <b>cacc</b> GGGGCGGACACGTGACGCGCG                                                                                                          | a9(M5) guide-1 F           |
| KL599                                                                 | <b>aaac</b> CGCGCGTCACGTGTCCGCCCC                                                                                                          | a9(M5) guide-1 R           |
| KL604                                                                 | TTACGCGTTATTGTTCTGCCGGGCGGACACTATTCGCGCGTGGCCAAATGGGGGCGGGGC<br>GCCG                                                                       | 30 nt overhang M5 template |
| KL605                                                                 | CACCGGGCCATTAATAGCGTGC GGAGTGATTTACGCGTTATTGTTCTGCCGGGCGGACAC<br><u>TATTCGCGCGTGGCCAATGGGGGCGGGGCGCCGCAACTTATTAGGTGACTGTACTTCA</u><br>CCCC | 60 nt overhang M5 template |
| KL596                                                                 | CTTCGTTGGCCACAATTAAAACAAACCAG                                                                                                              | a9 IRES primer F (364 nt)  |
| KL606                                                                 | GCCGGGCGGACACTATTT                                                                                                                         | M5-spec primer F (219 nt)  |
| KL597                                                                 | GCCCAGCAGGAAGGAGTC                                                                                                                         | a9 CDS primer R            |
| <b><i>In vitro transcription DNA template primer</i></b>              |                                                                                                                                            |                            |
| KL583                                                                 | TCGAAATAATACGACTCACTATAGGG                                                                                                                 | T7 IVT primer F            |
| KL584                                                                 | TTTTTTTTTTTTTTTTTTTTTTTTTTTTTTTTTTTTTTTTTTTTTTTTTTTTTTTTTTTTCTCGAGCGGC                                                                     | polyA IVT primer R         |
| KL589                                                                 | TAATACGACTCACTATAGGGAGACTAGGCTTTTGCAAAAAGCTT                                                                                               | pGL3-T7 promoter F         |
| KL588                                                                 | TCTAGAATTACACGGCGATCTTTCCGCC                                                                                                               | IVT_Fluc_R                 |
| <b><i>Hybrid ES9S sequences</i></b>                                   |                                                                                                                                            |                            |
| 24 nt                                                                 | CCTACTAAATAGTGGTGCTAGCATTGCTGGTTATCCACTTCTTAGAGG                                                                                           | Yeast WT ES9S              |
| 31 nt                                                                 | CCTACTAAATAGTTACGCGACCCCGAGCGGTCGGCGTCCCCCAACTTCTTAGAGG                                                                                    | hES9S                      |
| 33 nt                                                                 | CCTACTAAATAGTGGTGCTAGCCCGAGCGGTCGGCCTGGTTATCCACTTCTTAGAGG                                                                                  | hES9S-VA                   |
| 22 nt                                                                 | CCTACTAAATAGTGGTGCTAGCGGGCTGGTTATCCACTTCTTAGAGG                                                                                            | hES9S-VB                   |
| 24 nt                                                                 | CCTACTAAATAGTGGTGCTAGCGGGGCTGGTTATCCACTTCTTAGAGG                                                                                           | hES9S-VC                   |

---
